# Supplementary material for: Leptospira surface adhesin (Lsa21) induces Toll like receptor 2 and 4 mediated inflammatory responses in macrophages
Source: PubMed Central journal article supplement (PMC5172228; doi:10.1038/srep39530), 2016-12-20
Supplement: srep39530-s1.pdf [file srep39530-s1.pdf]

## **Supplementary Information**

### ***Leptospira* surface adhesin (Lsa21) induces Toll like receptor 2 and 4 mediated inflammatory responses in macrophages**

Syed M. Faisal<sup>1¶\*</sup>, Vivek P. Varma<sup>1¶</sup>, M. Subathra<sup>1¶</sup>, Sarwar Azam<sup>1</sup>, Anil K. Sunkara<sup>1</sup>, Mohd Akif<sup>2</sup>, Mirza. S. Baig<sup>3</sup>, Yung-Fu Chang<sup>4</sup>,

<sup>1</sup> Zoonotic and Infectious Diseases Lab, National Institute of Animal Biotechnology, Hyderabad, India.

<sup>2</sup>Department of Biochemistry, School of Life Sciences, University of Hyderabad, Hyderabad, India

<sup>3</sup>Centre for Biosciences and Biomedical Engineering, Indian Institute of Technology, Indore, MP, India

<sup>4</sup>Department of Population Medicine and Diagnostic Sciences, College of Veterinary Medicine, Cornell University, Ithaca, NY.

¶ Authors share equal contribution

\*Corresponding author: Syed M. Faisal, National Institute of Animal Biotechnology, Hyderabad-500049, India. Tel- 91-4023049423, Email-[faisal@niab.org.in](mailto:faisal@niab.org.in)

**The supplementary file contains Figure S1, Figure S2 and its legend and Table 1.**

**Figure S1**

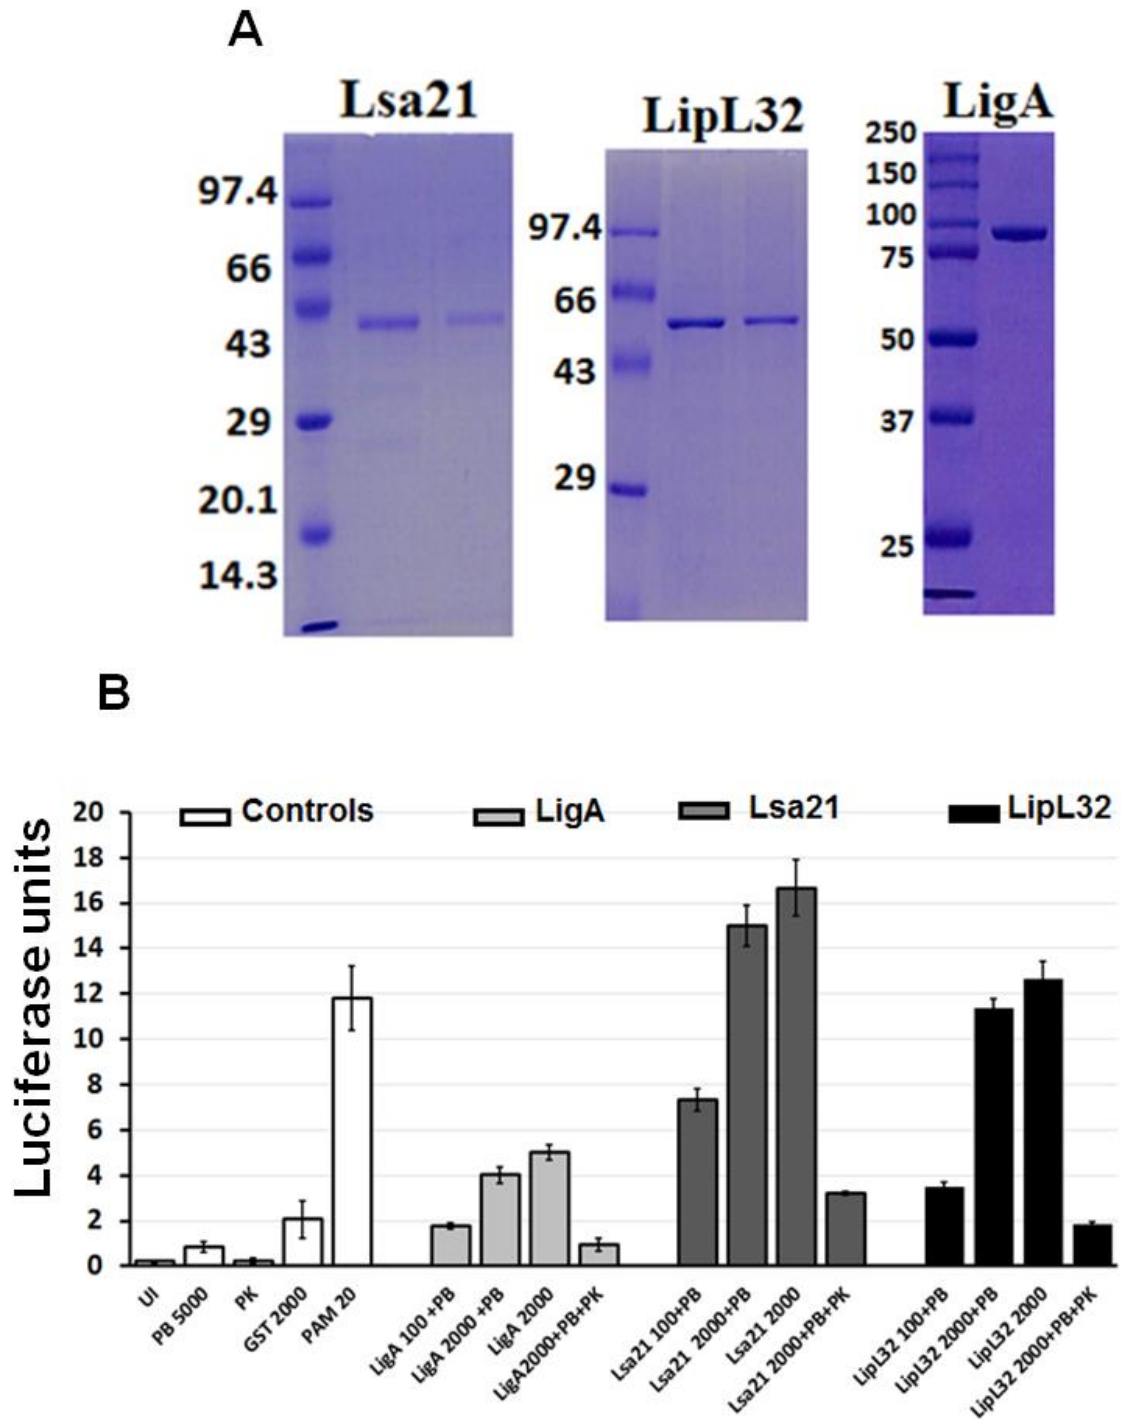

**Figure S1. Purification and testing of TLR activity of recombinant *Leptospira* surface proteins.**

(A) GST fusion *Leptospira* surface proteins (Lsa21, LipL32 and LigAvar) were purified using standard procedure. (B) Screening of *Leptospira* proteins for TLR2 activity on HEK293 cell lines. TLR2 activity measured by using Luciferase assay after stimulation with the proteins as described in material and methods.

**Figure S2**

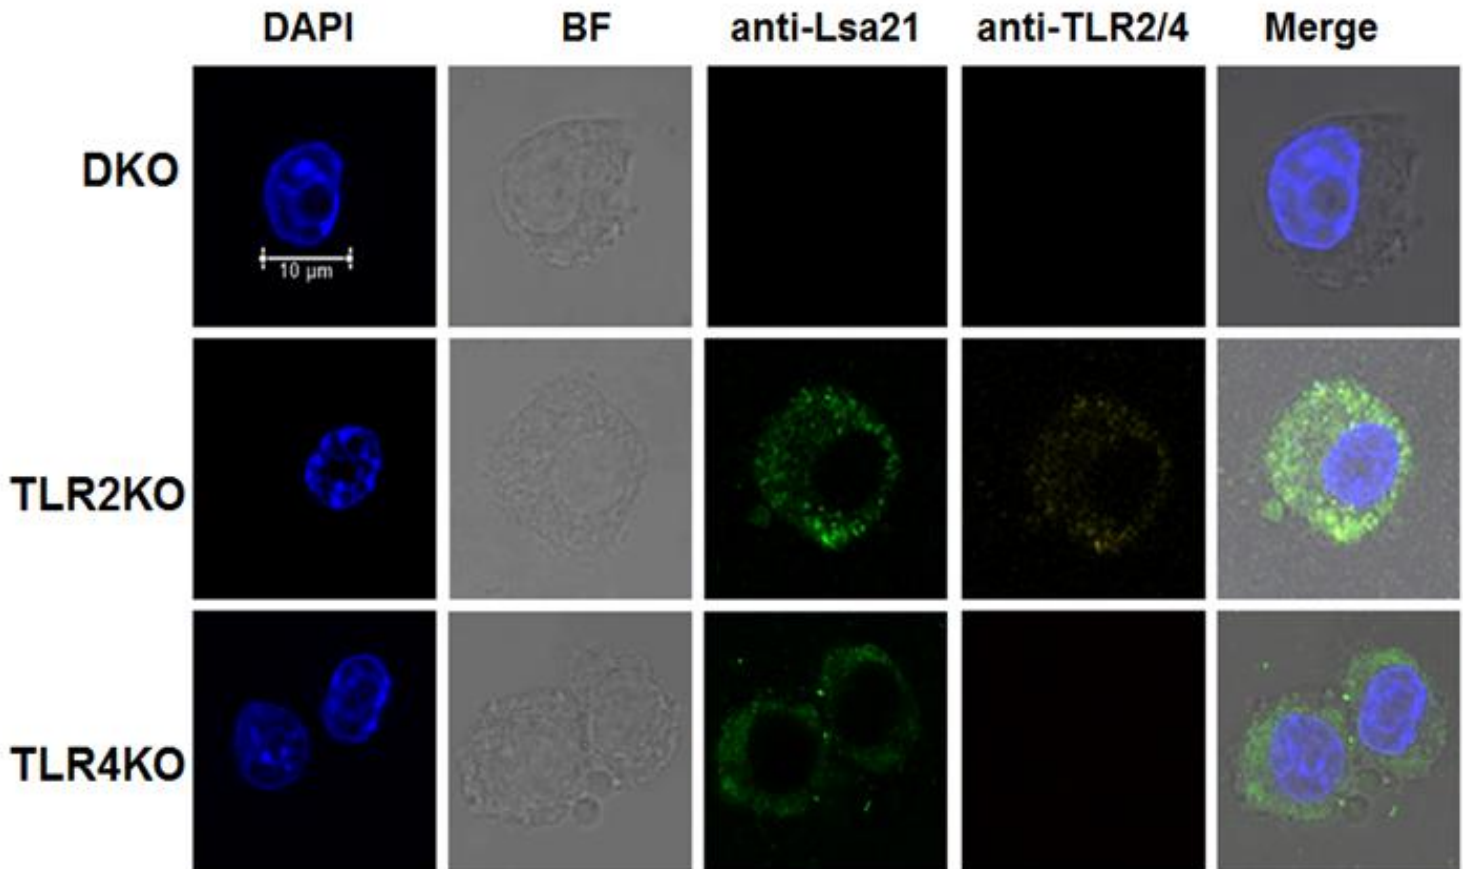

**Figure S2.** *rLsa21* interacts with *TLR2* and *TLR4*.  $TLR2^{-/-}$ ,  $TLR4^{-/-}$  and  $TLR2^{-/-}/4^{-/-}$  mouse macrophage cell lines were cultured in cell imaging dishes and then treated with *rLsa21* (2 μg/ml) for 30 min. After washing, the cells were fixed with 4% PFA and then sequentially incubated with mouse anti-*rLsa21* serum and FITC Goat anti-mouse IgG, Alexa Fluor® 647-rabbit anti-mouse *TLR2* and PE-rabbit anti-mouse *TLR4*. After washing, mounting medium (VECTASHIELD® with DAPI) was added and samples were viewed and photographed with confocal fluorescence microscopy. Data are representative of three independent experiments.

**Table1. Primers used for RT-PCR**

| S.NO | Gene          | Primer Sequence                                              |
|------|---------------|--------------------------------------------------------------|
| 1    | Beta actin    | F- CACCCACACTGTGCCCATCTACGA<br>R- GGATGCCACAGGATTCCATACCCA   |
| 2    | IL-1b         | F- GCCTTGGGCCTCAAAGGAAAGAATC<br>R- GGAAGACACAGATTCCATGGTGAAG |
| 3    | Il6           | F- TGGAGTCACAGAAGGAGTGGCTAAG<br>R- TCTGACCACAGTGAGGAATGTCCAC |
| 4    | TNF- $\alpha$ | F- ATAGCTCCCAGAAAAGCAAGC<br>R- CACCCCGAAGTTCAGTAGACA         |
| 5    | CCR5          | F - AACTCAGTATCATTCTGG<br>R- GGATCAGGCTCAAGATGACC            |
| 6    | Mcp1          | F- GGAAAATGGATCCACACCTTGC<br>R- TCTCTTCCCTCCACCACCATGCAG     |
| 7    | Tlr2          | F- CTCCTGAAGCTGTTGCGTTAC<br>R- GCTCCCTTACAGGCTGAGTTC         |
| 8    | Tlr4          | F- TCGCCTTCTTAGCAGAAACAC<br>R- GCCTTAGCCTCTTCTCCTTC          |
| 9    | Cox2          | F- TCTGGAACATTGTGAACAACATC<br>R- AAGCTCCTTATTTCCCTTCACAC     |
| 10   | Cxcr4         | F- GAAGTGGGGTCTGGAGACTATG<br>R- AGGGGAGTGTGATGACAAAGAG       |
| 11   | Icam2         | F- TGCTGTTCTTATTTGTGACATCTG<br>R- TGTATTGAGGCTAAAAAGGAGAGG   |
| 12   | CCL2          | F- ACGTGTTGGCTCAGCCAGA<br>R- ACTACAGCTTCCTTTGGGACACC         |
| 13   | iNOS          | F- CAGCCCAACAATACAAGATGACCC<br>R- CAGTTCCGAGCGTCAAAGACCTGC   |
| 14   | IFN-g         | F- ACTCAAGTGGCATAGATGTGGAAG<br>R- GACGCTTATGTTGTTGCTGATGG    |
| 15   | CCR4          | F- ATCCTGAAGGACTTCAAGCTCCA<br>R- AGGTCTGTGCAAGATCGTTTCATGG   |
| 16   | CXCR3         | F- GCCGGAGCACCAGCCAAGCCAT<br>R- AGGTGGAGCAGGAAGGTGTC         |
| 17   | CXCL10        | F- CATGGTCCTGAGACAAAAGT<br>R- TGATGACACAAGTTCTTCCA           |
| 18   | STAT 1        | F- AGGGGCCATCACATTCACAT<br>R- AGATACTTCAGGGGATTCTC           |
| 19   | CCL3          | F- ACTGCCTGCTGCTTCTCCTACA<br>R- AGGAAAATGACACCTGGCTGG        |
